# Supplementary material
Source: Elsevier journal article supplement (https://www.sciencedirect.com/science/article/pii/S0120563319300245)
Supplement: mmc1 [file S0120563319300245:mmc1.docx]

**ANEXOS**

| Tabla 1 Variables que se incluyeron en el modelo regresión logística multivariable final para predecir mortalidad global en pacientes con diagnóstico de fibrilación auricular según el análisis univariado. | |
| --- | --- |
| Variable | *p* |
| Edad > 75 años | ,086 |
| Ingreso por fibrilación auricular | ,000 |
| Marcapaso permanente | ,020 |
| Antecedente de falla cardíaca | ,009 |
| Antecedente de EPOC | ,051 |
| TFG entre 30 – 50 ml/min/1,73 m2 | ,005 |
| TFG entre > 50 ml/min/1,73 m2 | ,004 |
| ACV/AIT asociado | ,063 |
| Infarto agudo de miocardio asociado | ,040 |
| EPOC descompensado asociado | ,006 |
| Cirugía no torácica, no cardíaca | ,083 |
| Falla cardíaca descompensada asociada | ,000 |
| Infección asociada | ,000 |
| CHA2DS2VASc | ,016 |
| HAS-BLED | ,000 |
| FEVI < 40% | ,024 |
| Área de la aurícula izquierda < 20 cm2 | ,028 |
| Área de la aurícula izquierda < 20-30 cm2 | ,045 |
| Estenosis aórtica | ,046 |
| Septum | ,030 |
| PSAP | ,010 |

ACV= accidente cerebrovascular agudo. AIT= ataque isquémico transitorio. EPOC= enfermedad pulmonar obstructiva crónica. FEVI= fracción de eyección del ventrículo izquierdo. PSAP= presión sistólica de la arteria pulmonar. TFG= tasa de filtración glomerular.

| Tabla 2 Variables que se incluyeron en el modelo de regresión logística multivariable final para predecir mortalidad por causas cardiovasculares en pacientes con diagnóstico de fibrilación auricular según el análisis univariado. | |
| --- | --- |
| Variable | *p* |
| Ingreso por fibrilación auricular | ,007 |
| Marcapaso temporal | ,027 |
| Marcapaso permanente | ,007 |
| Antecedente de falla cardíaca | ,006 |
| TFG entre 30 – 50 ml/min/1,73 m2 | ,009 |
| TFG entre > 50 ml/min/1,73 m2 | ,003 |
| Infarto agudo de miocardio asociado | ,000 |
| EPOC descompensado asociado | ,084 |
| Falla cardíaca descompensada asociada | ,000 |
| Infección asociada | ,002 |
| FEVI < 40% | ,000 |
| FEVI > 50% | ,001 |
| Área de la aurícula izquierda < 20 cm2 | ,039 |
| Insuficiencia aórtica | ,075 |
| Septum | ,045 |

EPOC= enfermedad pulmonar obstructiva crónica. FEVI= fracción de eyección del ventrículo izquierdo. TFG= tasa de filtración glomerular.

| Tabla 3 Variables que se incluyeron en el modelo de regresión logística multivariable final para predecir mortalidad por causas no cardiovasculares en pacientes con diagnóstico de fibrilación auricular según el análisis univariado. | |
| --- | --- |
| Variable | *p* |
| Edad > 75 años | ,043 |
| Ingreso por fibrilación auricular | ,004 |
| Antecedente de diabetes mellitus | ,019 |
| IMC 18,5-24,9 kg/m2 | ,040 |
| IMC 25-29,9 kg/m2 | ,064 |
| EPOC descompensado asociado | ,037 |
| Cirugía no torácica, no cardíaca | ,004 |
| Infección asociada | ,000 |
| CHA2DS2VASc | ,043 |
| HAS-BLED | ,000 |
| FEVI > 50% | ,090 |
| Estenosis aórtica | ,058 |
| PSAP | ,044 |

EPOC= enfermedad pulmonar obstructiva crónica. FEVI= fracción de eyección del ventrículo izquierdo. IMC= índice de masa corporal. PSAP= presión sistólica de la arteria pulmonar.
